# Supplementary material for: Respiratory Syncytial Virus Infects Primary Neonatal and Adult Natural Killer Cells and Affects Their Antiviral Effector Function
Source: PubMed Central journal article supplement (PMC6376914; doi:10.1093/infdis/jiy566), 2018-09-25

## A. Activating receptors

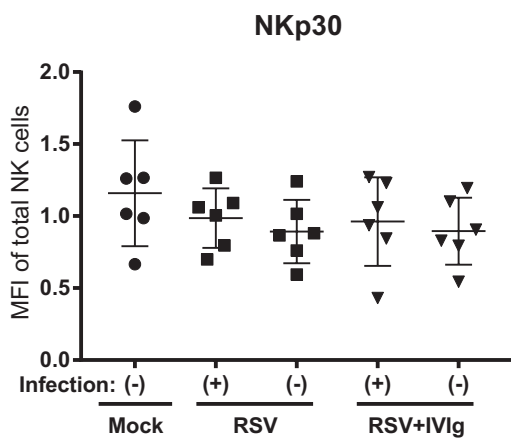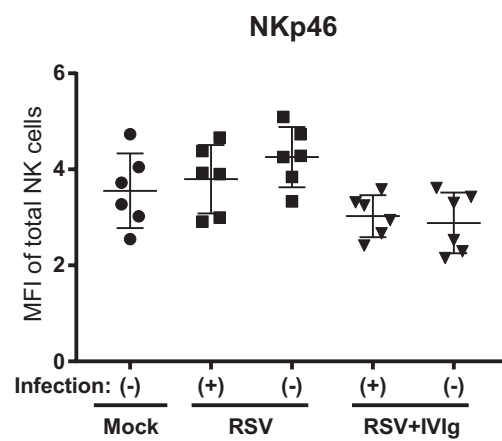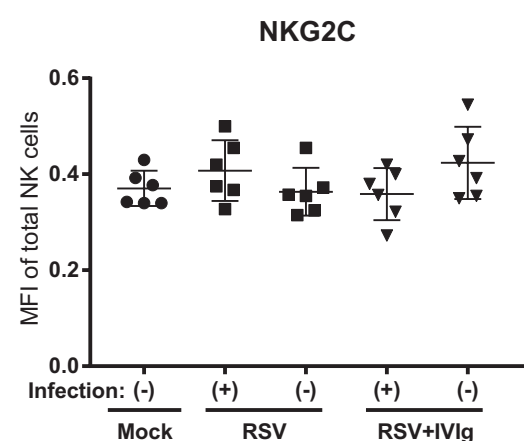

## B. KIRs

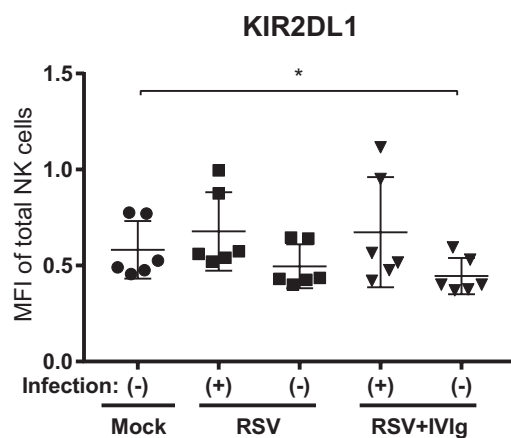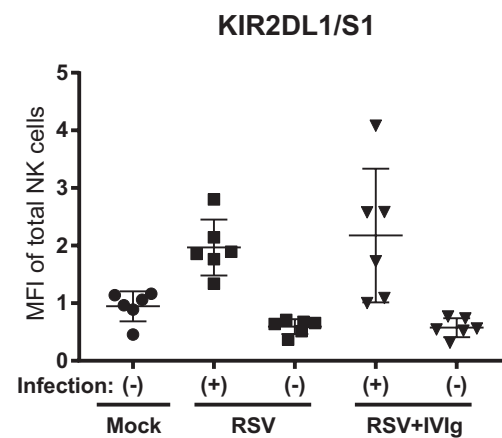

## C. Inhibitory receptors

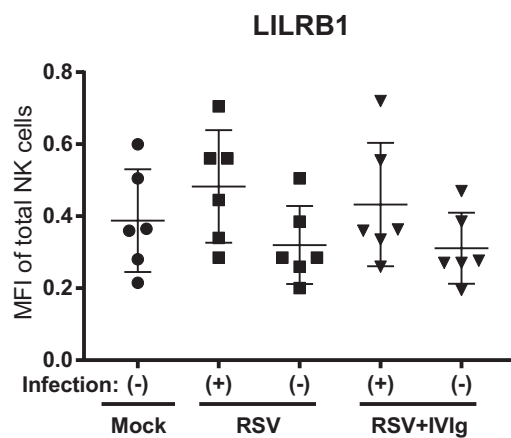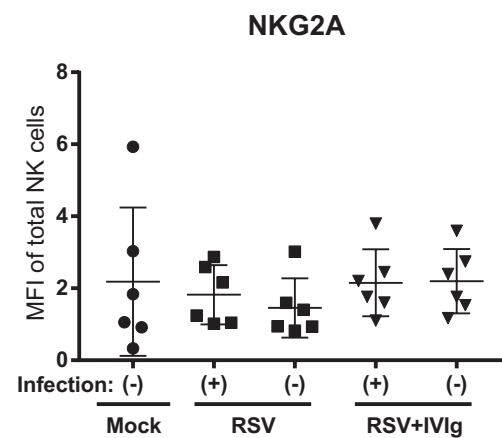

## D. Dual-function receptors

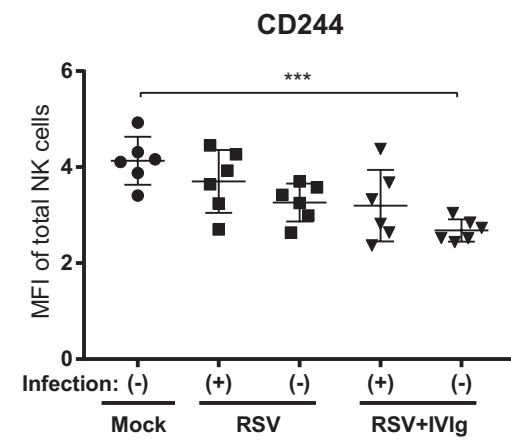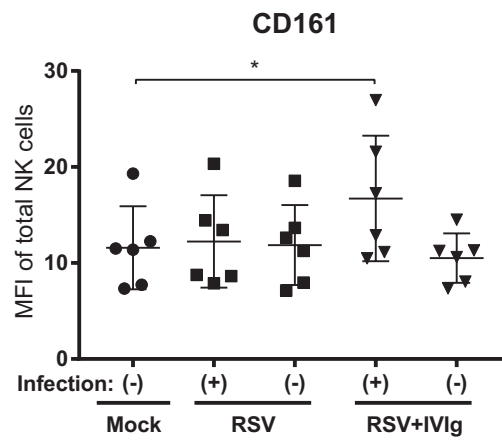

Supplement: jiy566_suppl_supplementary_figure_2.pdf [file jiy566_suppl_supplementary_figure_2.pdf]
